# Supplementary material for: Detection of Persistent Viruses by High-Throughput Sequencing in Tomato and Pepper from Panama: Phylogenetic and Evolutionary Studies
Source: MDPI journal article supplement (doi:10.3390/plants10112295), 2021-10-26
Supplement: s1 [file s1]

| Name       | Sequence (5'-3')                              | Genomic region            |
|------------|-----------------------------------------------|---------------------------|
| BPEV_F     | GGT ACA AAT TTA GTG CAC ACC G                 | 11875-11897 (Polyprotein) |
| BPEV_R     | TCT CGG TTC CAA TTT CGG TC                    | 12093-12073 (Polyprotein) |
| BPEV_probe | 6FAM-TGG ATA AA TGA CGG CAC ATG TTG GGA-TAMRA | 11992-12019 (Polyproyein) |
| STV_F      | TGC CTC CCC AGC TGT CA                        | 1189-1206 (CP/RdRp)       |
| STV_R      | TGC GTT GGG ATA GAG GAG TGA                   | 1236-1257 (CP/RdRp)       |
| STV_probe  | 6FAM-CGC AAC AGA GGT AGA GGC AGA GGC C-TAMRA  | 1209-1234 (CP/RdRp)       |
