# Supplementary material for: Detection of Persistent Viruses by High-Throughput Sequencing in Tomato and Pepper from Panama: Phylogenetic and Evolutionary Studies
Source: MDPI journal article supplement (doi:10.3390/plants10112295), 2021-10-26
Supplement: s1 [file s1]

| Isolate              | Country            | Accession n. | Host                 | Variety        | Collection year |
|----------------------|--------------------|--------------|----------------------|----------------|-----------------|
| BPEV_Panama          | Panama             | MZ122790     | <i>C. annuum</i>     | Unknown        | 2018            |
| BPEV_EL Ejido        | Panama             | -            | <i>C. annuum</i>     | Local Idiap149 | 2018            |
| BPEV_Tierra Blanca 1 | Panama             | -            | <i>C. annuum</i>     | Local Idiap149 | 2018            |
| BPEV_Tierra Blanca 2 | Panama             | -            | <i>C. annuum</i>     | Local Idiap149 | 2018            |
| BPEV_N65             | Slovakia           | MN580384     | <i>C. annuum</i>     | Promotor       | 2017            |
| BPEV_TW              | India              | KU923756     | <i>C. annuum</i>     | Taiwan2        | 2015            |
| BPEV_DR              | Dominican Republic | KX522567     | <i>C. annuum</i>     | Unknown        | 2013            |
| BPEV_IS              | Israel             | JQ951943     | <i>C. annuum</i>     | Atir           | 2011            |
| BPEV_Ontario         | Canada             | KT149366     | <i>C. annuum</i>     | Healy          | 2014            |
| BPEV_Santa Fe        | Colombia           | KX977568     | <i>C. annuum</i>     | Unknown        | 2015            |
| BPEV-YW              | USA                | JN019858     | <i>C. annuum</i>     | Yolo Wonder    | 2007            |
| BPEV_Penol           | Colombia           | KX977569     | <i>C. annuum</i>     | Unknown        | 2015            |
| BPEV_lj              | China              | KF709944     | <i>C. annuum</i>     | Unknown        | 2012            |
| BPEV_Kyosuzu         | Japan              | AB597230     | <i>C. annuum</i>     | Kyosuzu        | 2011            |
| BPEV_Antioquia May5  | Colombia           | MN073197     | <i>C. annuum</i>     | Unknown        | 2018            |
| BPEV_MS1             | Ecuador            | MN175323     | <i>C. annuum</i>     | Unknown        | 2017            |
| BPEV_XJ              | China              | MH182675     | <i>C. annuum</i>     | Luosijiao      | 2017            |
| BPEV_LA-E            | USA                | MT013204     | <i>C. frutescens</i> | Unknown        | 2017            |
