# Supplementary material for: Detection of Persistent Viruses by High-Throughput Sequencing in Tomato and Pepper from Panama: Phylogenetic and Evolutionary Studies
Source: MDPI journal article supplement (doi:10.3390/plants10112295), 2021-10-26
Supplement: s1 [file s1]

| <b>Isolate</b>     | <b>Country</b> | <b>Accession n.</b> | <b>Tomato variety</b> | <b>Collection year</b> |
|--------------------|----------------|---------------------|-----------------------|------------------------|
| STV_Panama         | Panama         | MT051992            | Local                 | 2019                   |
| STV_JKI ID 1904213 | Germany        | MK948544            | Unknown               | 2018                   |
| STV_Florida        | USA            | KX949574            | Sweet hearts          | 2013                   |
| STV_NC12-03-08     | USA            | KT852573            | Unknown               | 2012                   |
| STV_MS-7           | USA            | EU413670            | Unknown               | 2005                   |
| STV_Thailand       | Thailand       | LC487710            | Unknown               | 2019                   |
| STV_M82            | Japan          | LC429302            | M82                   | 2018                   |
| STV_MG             | Brazil         | MG808383            | Dominator             | 2013                   |
| STV_IL             | Israel         | MH356747            | Unknown               | 2017                   |
| STV_GCN06          | Spain          | KJ174690            | Mariana               | 2006                   |
| STV_BD-13          | Bangladesh     | KT634055            | Unknown               | 2013                   |
| STV_Mexico-1       | Mexico         | EF442780            | Unknown               | 2005                   |
| STV_DDT            | Vietnam        | MW012413            | Unknown               | 2017                   |
| STV_DCT            | Vietnam        | MW012412            | Unknown               | 2017                   |
| STV_DTT            | Vietnam        | MW012411            | Unknown               | 2017                   |
| STV_GLT            | Vietnam        | MW012410            | Unknown               | 2017                   |
| STV_Pk             | Pakistan       | MT066231            | Rio Grande            | 2019                   |
| STV_May5           | Colombia       | MN095716            | Unknown               | 2018                   |
| STV_Tom6-T         | France         | MN216389            | Unknown               | 2018                   |
| STV_Tom5-N         | France         | MN216388            | Unknown               | 2018                   |
| STV_Tom5-T         | France         | MN216387            | Unknown               | 2018                   |
| STV_Tom3-T         | France         | MN216385            | Unknown               | 2018                   |
| STV_Tom1-T         | France         | MN216384            | Unknown               | 2018                   |
| STV_Canada         | Canada         | MK610257            | Premio                | 2019                   |
| STV_CH_bpo163      | Switzerland    | MF422618            | Merlice               | 2014                   |
| STV_CH_bpo161      | Switzerland    | MF422617            | Merlice               | 2014                   |
| STV_FERA_160205    | UK             | KY810783            | Unknown               | 2016                   |

|              |                       |          |        |      |
|--------------|-----------------------|----------|--------|------|
| STV_DR       | Dominican<br>Republic | KX525266 | Unknow | 2013 |
| STV_XJ-p     | China                 | KY228384 | Unknow | 2015 |
| STV_CN-12    | China                 | KT438549 | Unknow | 2012 |
| STV_Gimcheon | South Korea           | LC270272 | Unknow | 2017 |

---
